# Supplementary material for: tappAS: a comprehensive computational framework for the analysis of the functional impact of differential splicing
Source: PubMed Central journal article supplement (PMC7236505; doi:10.1186/s13059-020-02028-w), 2020-05-18
Supplement: 13059_2020_2028_MOESM1_ESM.pdf [file 13059_2020_2028_MOESM1_ESM.pdf]

## Additional File 1: Supplementary Figures and Tables

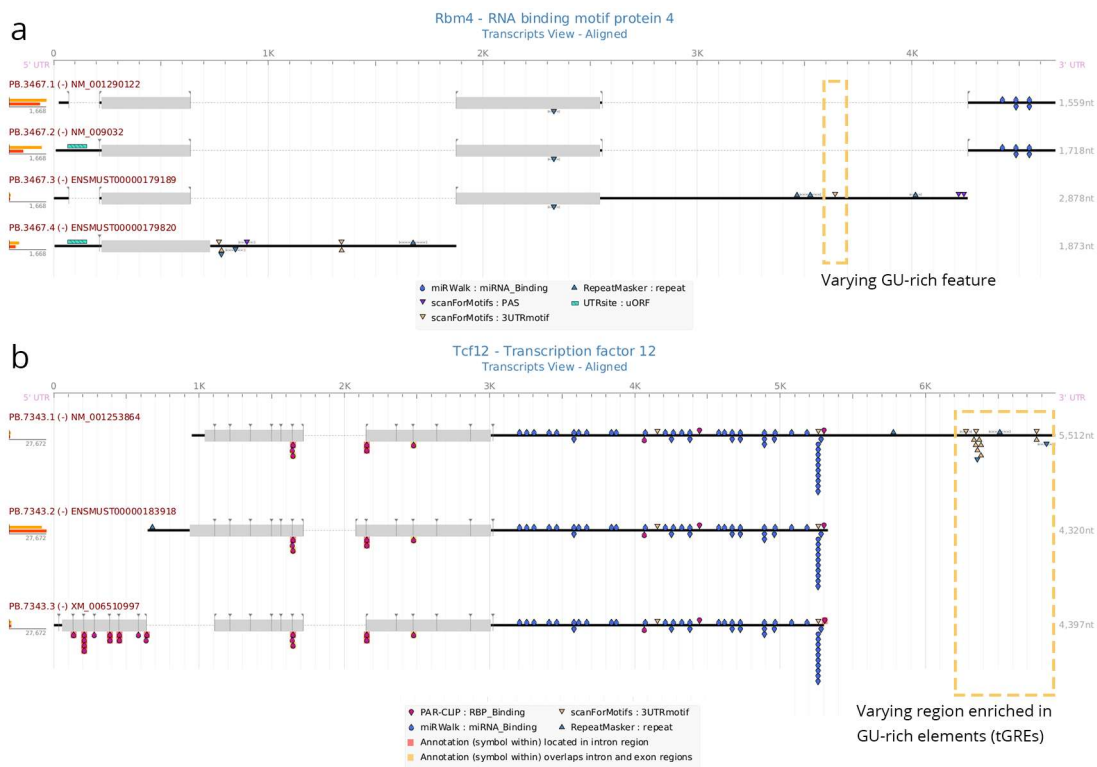

**Figure S1: tappAS visualization of functional feature variation across isoforms.** A) The *Rbm4* gene presents transcript-level variation in the inclusion of a GU-rich element (GRE) in the 3'UTR due to an exon-skipping event. B) Transcript-level variation in one of the isoforms of the *Tcf12* gene, which includes a 3'UTR region enriched in GREs due to an alternative TTS.

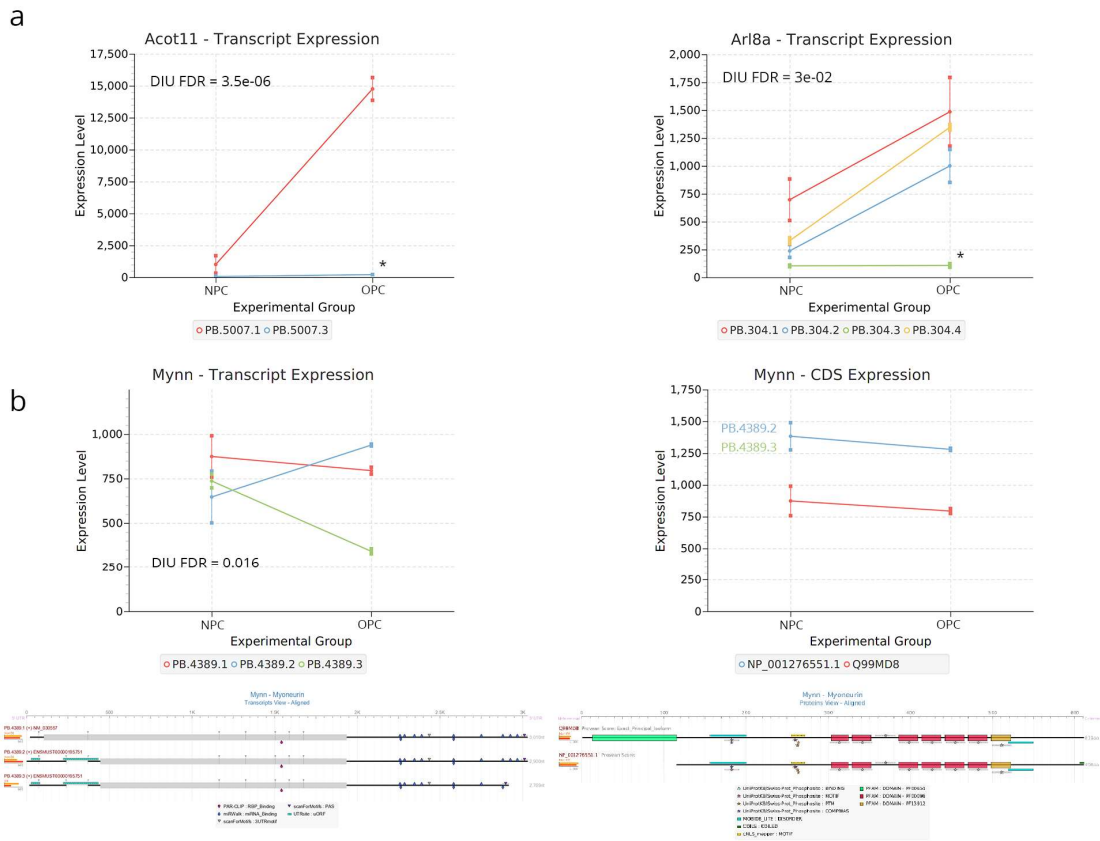

**Figure S2: DE and DIU analysis results.** A) Two examples of genes (*Acot11* and *Arl8*) detected as false positives for Differential Isoform Usage after minor isoform filtering (% expression < 0.1), i.e. where removal of the minor isoform leads to no DIU status. (\*) indicates transcripts that were removed after minor isoform filtering. B) Expression charts and tappAS visualization of annotated functional features at the transcript (left) and protein (right) levels for the *Mynn* gene, where Differential Isoform Usage and major isoform switching imply no Differential Coding sequence Usage. Transcripts encoding the same protein are indicated using the PacBio transcript labels.

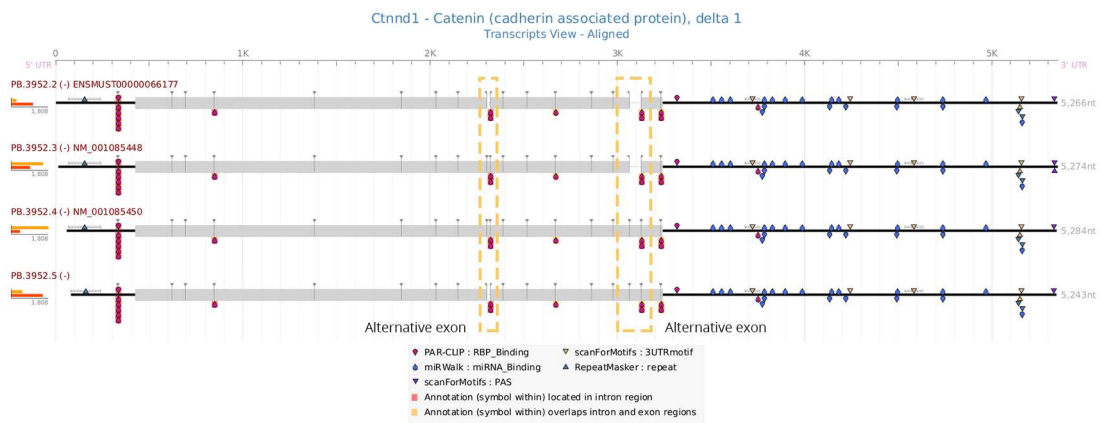

**Figure S3:** tappAS transcript view of the *Ctnnd1* gene. AltTEM events (i.e. alternative exons) that are different across isoforms are highlighted where relevant.

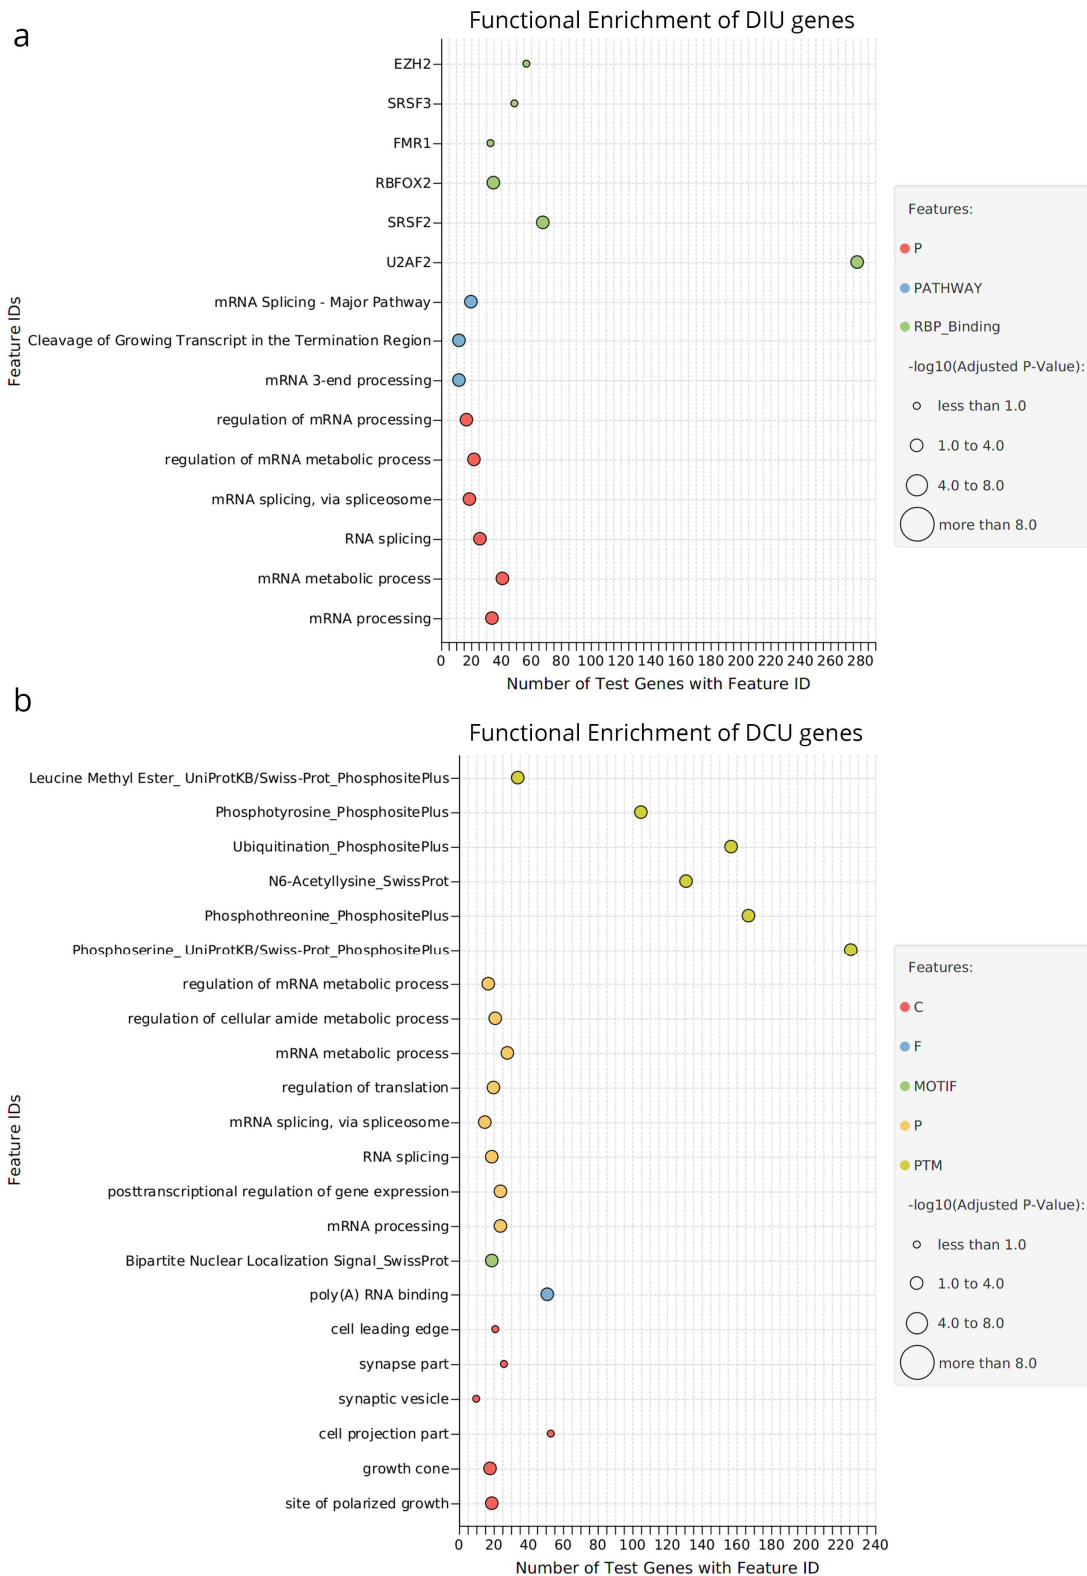

**Figure S4: Functional Enrichment Results** (Fisher’s Exact Test, with Benjamini-Hochberg multiple testing correction) for DIU (A) and DCU (B) genes (minor isoform filtering: proportion < 10%) using DE genes as background. Dot color indicates the functional category of the feature, while dot size indicates significance.

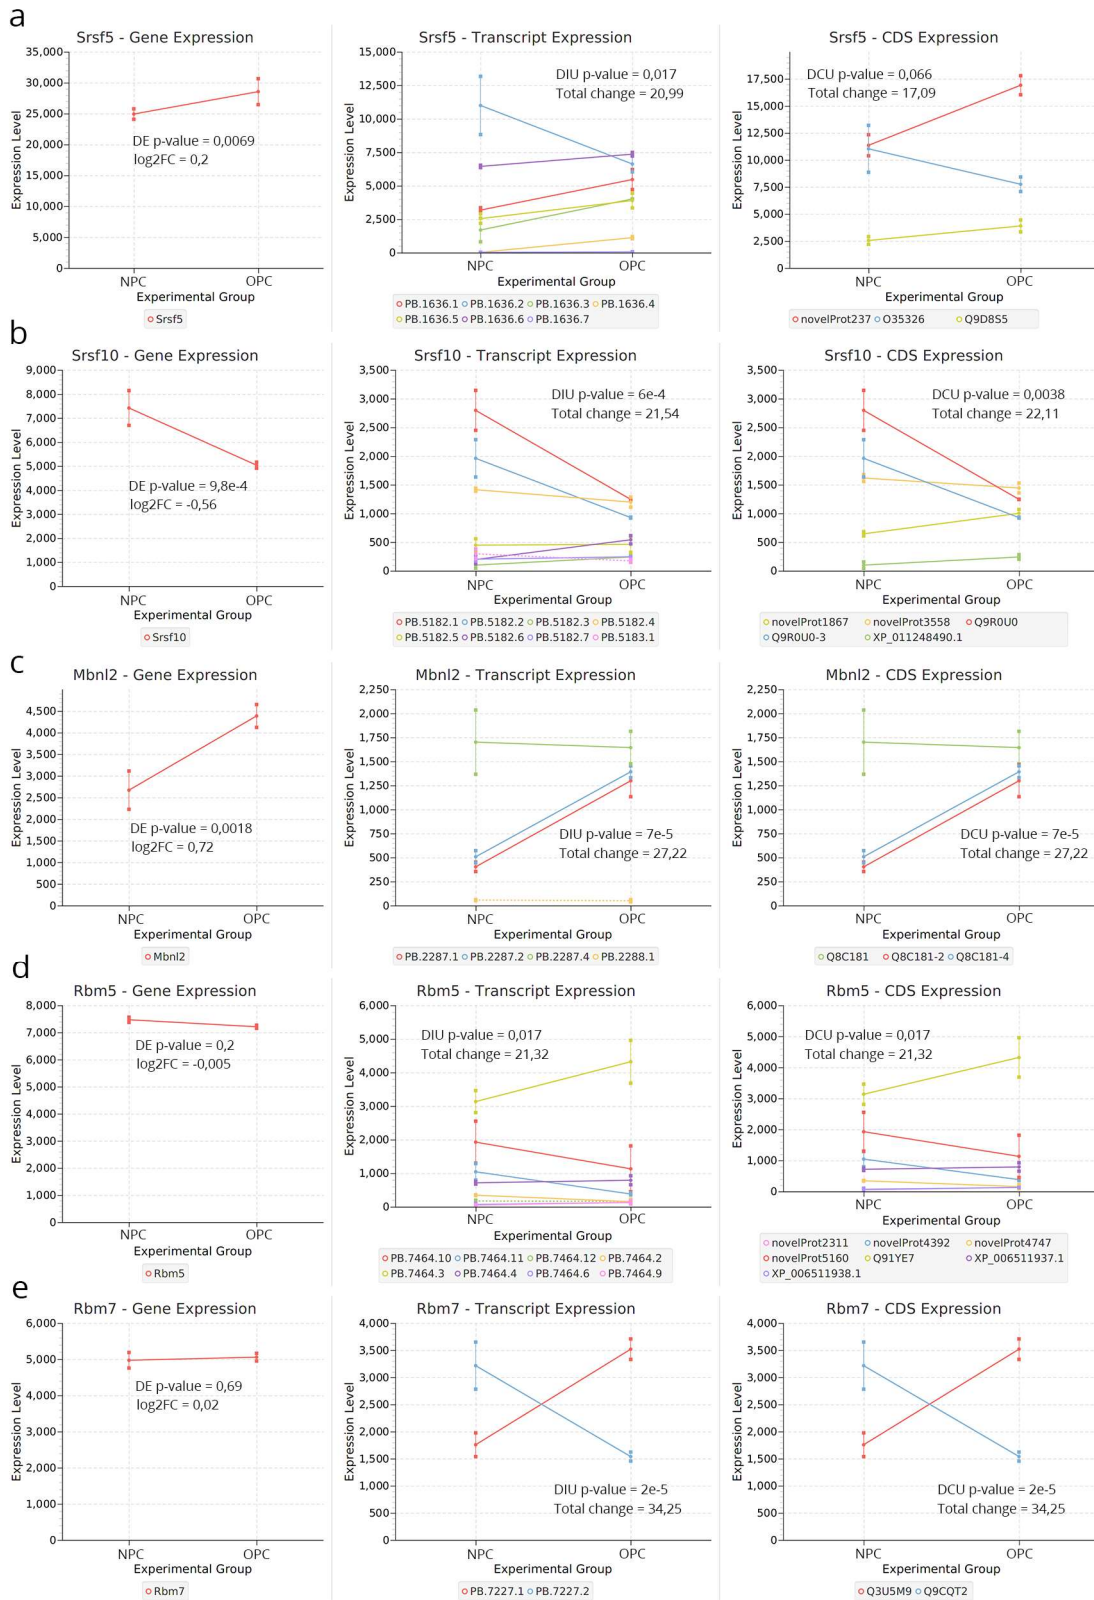

**Figure S5: Splicing factors regulated by DIU.** Transcript, gene and protein expression levels providing evidence of DIU status and self-regulation of the AltTEM machinery: A) *Srsf5*, B) *Srsf10*, C) *Mbnl2*, D) *Rbm5*, E) *Rbm7*. DIU and/or DCU (indicated only when significantly different from DIU results) significance corresponds to multiple testing adjusted FDRs.

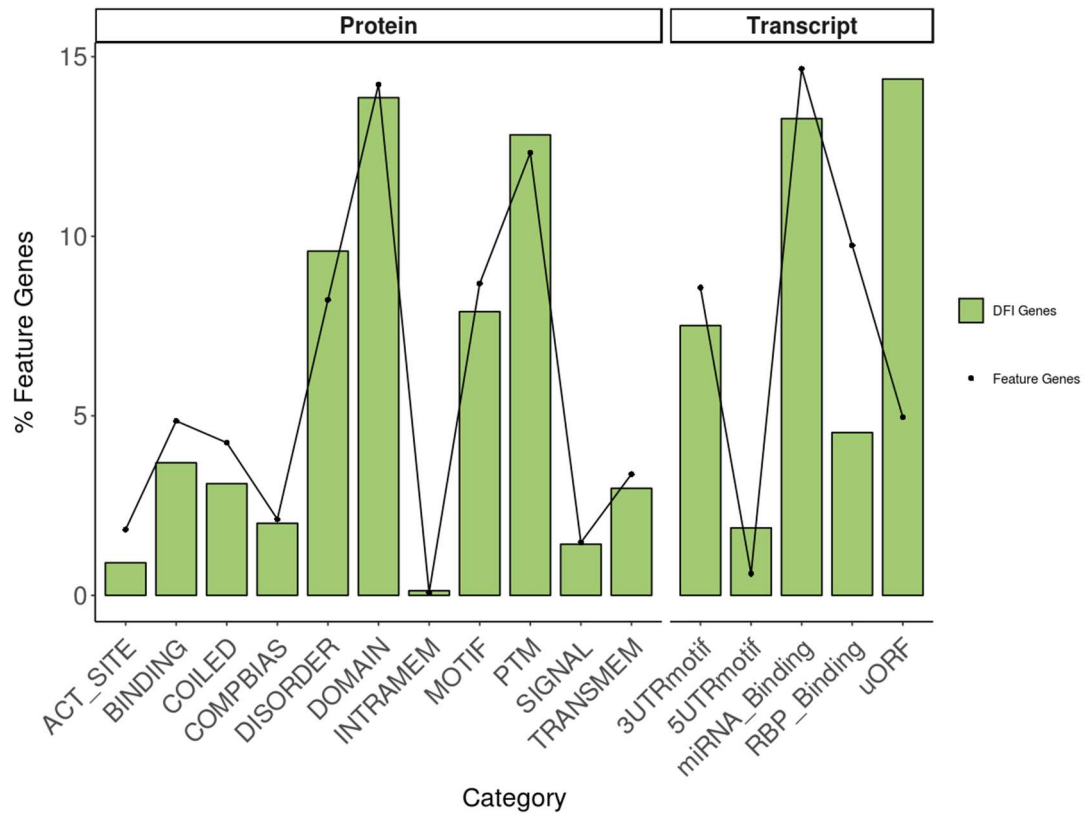

**Figure S6: DFI results by gene.** Distribution (%) of features annotated in the transcriptome (dots) vs differentially included features revealed by the analysis (bars). The relative over-representation of DFI features in specific categories is evaluated by Fisher Exact tests and corrected for multiple testing using the Benjamini-Hochberg method. Multiple occurrences of features belonging to the same annotation category in a single gene were considered only once. Significant categories are marked by asterisks: (\*\*\*)  $p < 0.001$ ; (\*\*)  $p < 0.01$ ; (\*)  $p < 0.05$ .

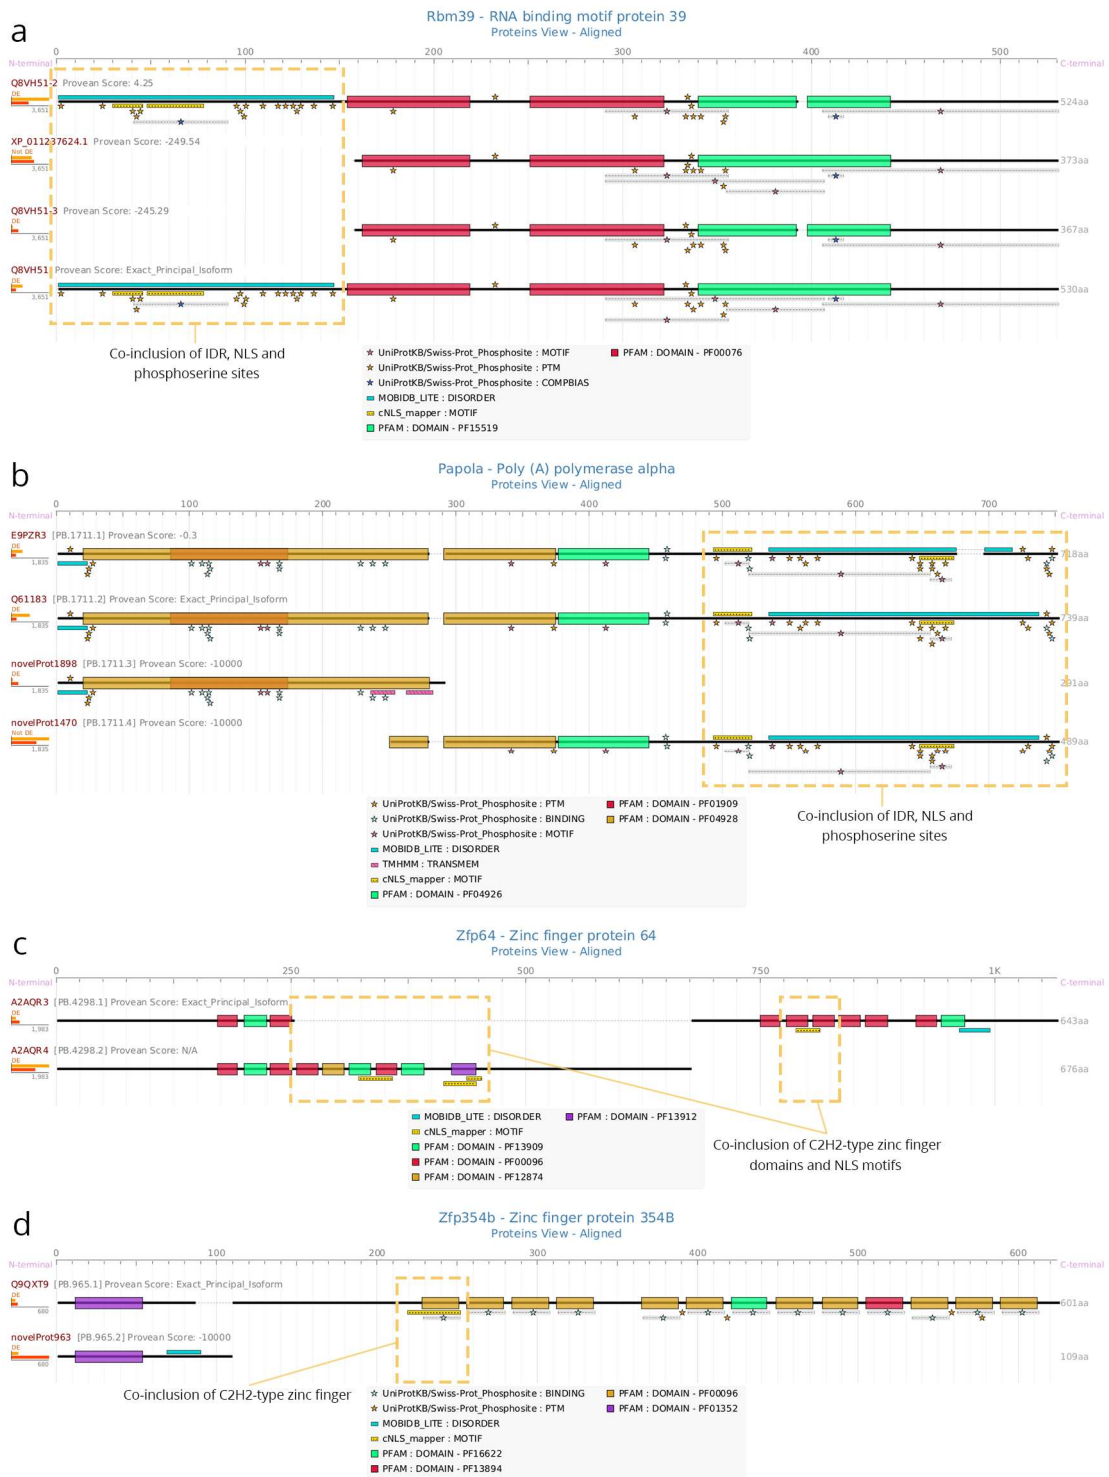

**Figure S7: co-DFI results examples.** A) Variation in the inclusion of protein-level functional elements in the *Rbm39* gene, which presents co-DFI status for an Intrinsically Disordered Region (IDR, DISORDER), several phosphoserine residues (PTM) and a Nuclear Localization Signal (NLS, MOTIF). B) Protein-level functional elements in the *Papola* gene, which presents co-DFI status for an IDR (DISORDER), several phosphoserine residues and two NLS (MOTIF). C) Protein visualization of the *Zfp64* gene, which presents co-DFI status of several C2H2-type zinc finger domains (PF13912, PF00096 and PF13909) and NLS motifs. D) The *Zfp354b* gene presents co-DFI status of a C2H2-type zinc finger domain (PF00096) and an NLS motif.

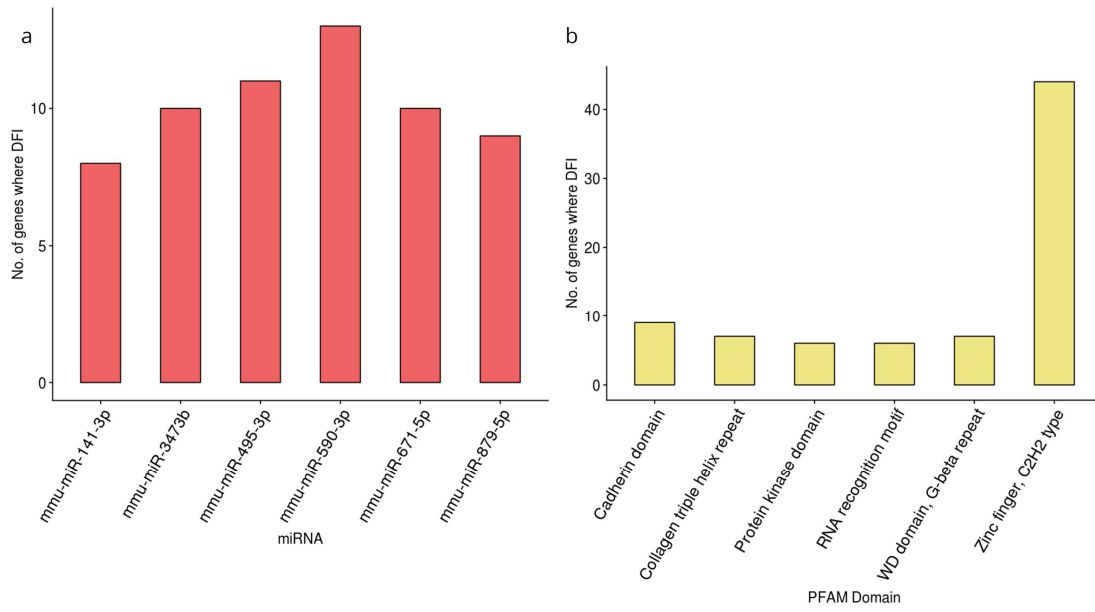

**Figure S8: co-occurrence at the gene level between DPA and DFI for several feature categories.**

DFI frequencies (i.e. number of genes that are simultaneously DFI for a given feature and significant for DPA) are shown for A) top-6 most frequently DFI miRNA binding sites among DPA genes and B) top-6 most frequently DFI PFAM domains among DPA genes.



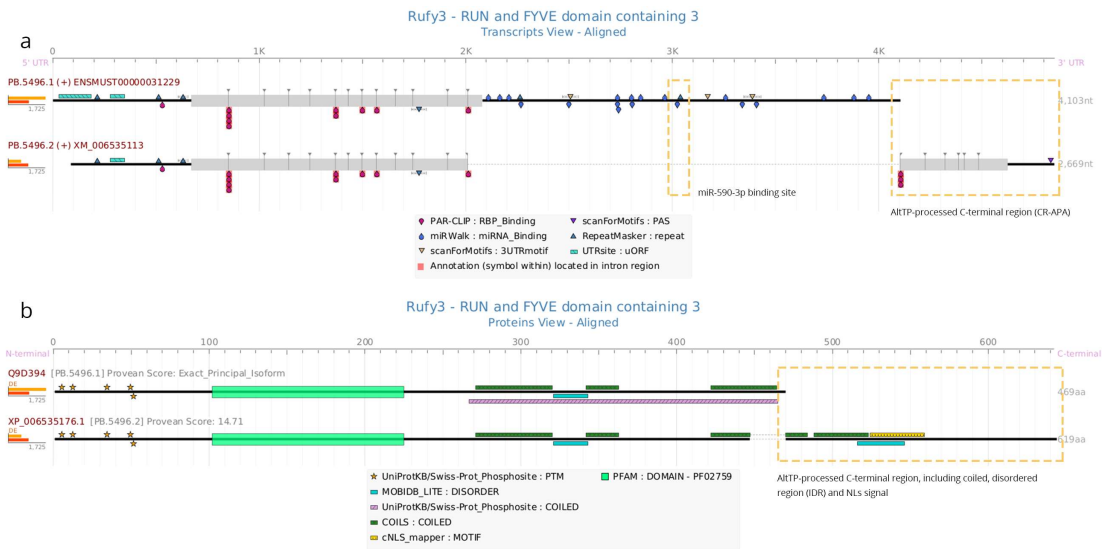

**Figure S9: tappAS visualization of the *Rufy3* gene.** A) tappAS visualization of transcript-level annotation for the *Rufy3* gene, where Coding Region -APA induced inclusion of miR-590-3p binding site is coupled with disruption of the C-terminal part of the protein. B) *Rufy3* protein-level annotation, showing missing C-terminal coiled, disordered regions (IDRs) and NLS signal.

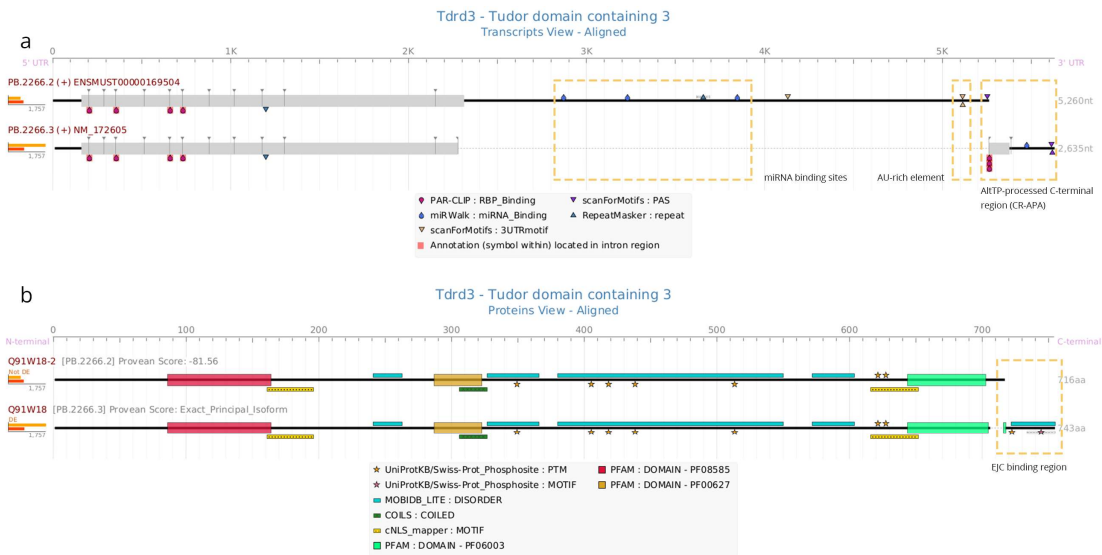

**Figure S10: tappAS visualization of the *Tdrd3* gene.** A) tappAS visualization of transcript-level annotation for the *Tdrd3* gene, where Codign Region -APA induced inclusion of several miRNA binding sites as well as an AU-rich element can be observed. B) *Tdrd3* protein-level annotation, where an EJC binding motif variation is caused by CR-APA-driven differential processing of the C-terminal region.

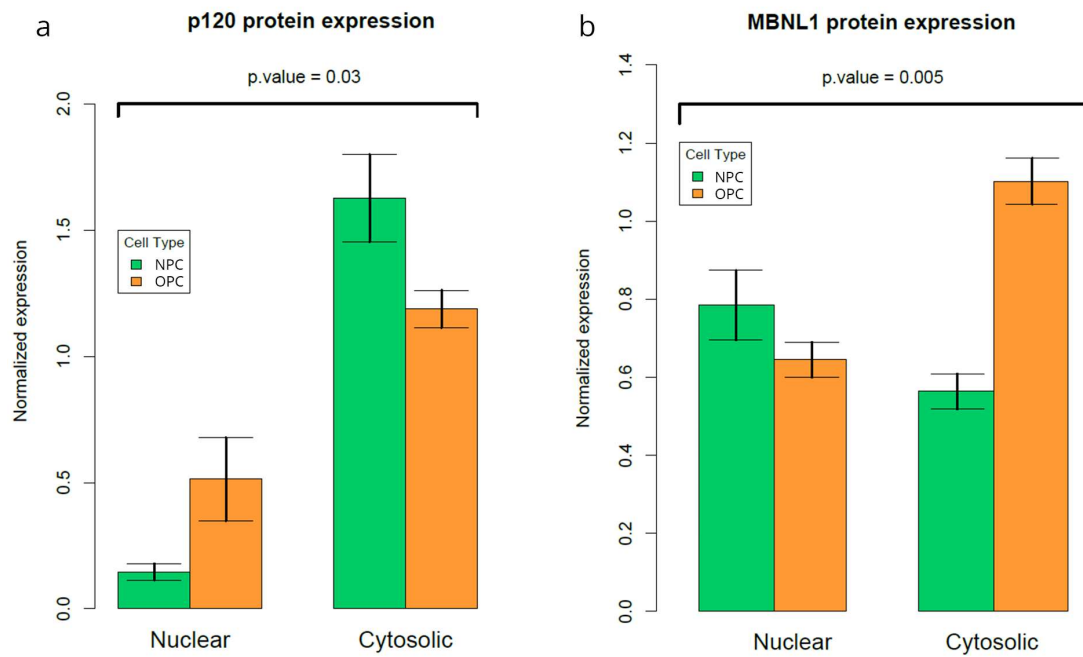

**Figure S11: Western blot densitometry results** for A) p120 (Ctnd1) and B) Mbnl1. For each cell type (NPCs and OPCs), protein expression values obtained in densitometry after normalization with the relevant Western blot controls (H3 for nuclear, tubulin for cytosolic) are shown for nuclear and cytosolic fractions. Error bars correspond to standard deviations obtained after replicate 1 and 2 quantifications. P-values obtained by linear model fitting (see Methods).

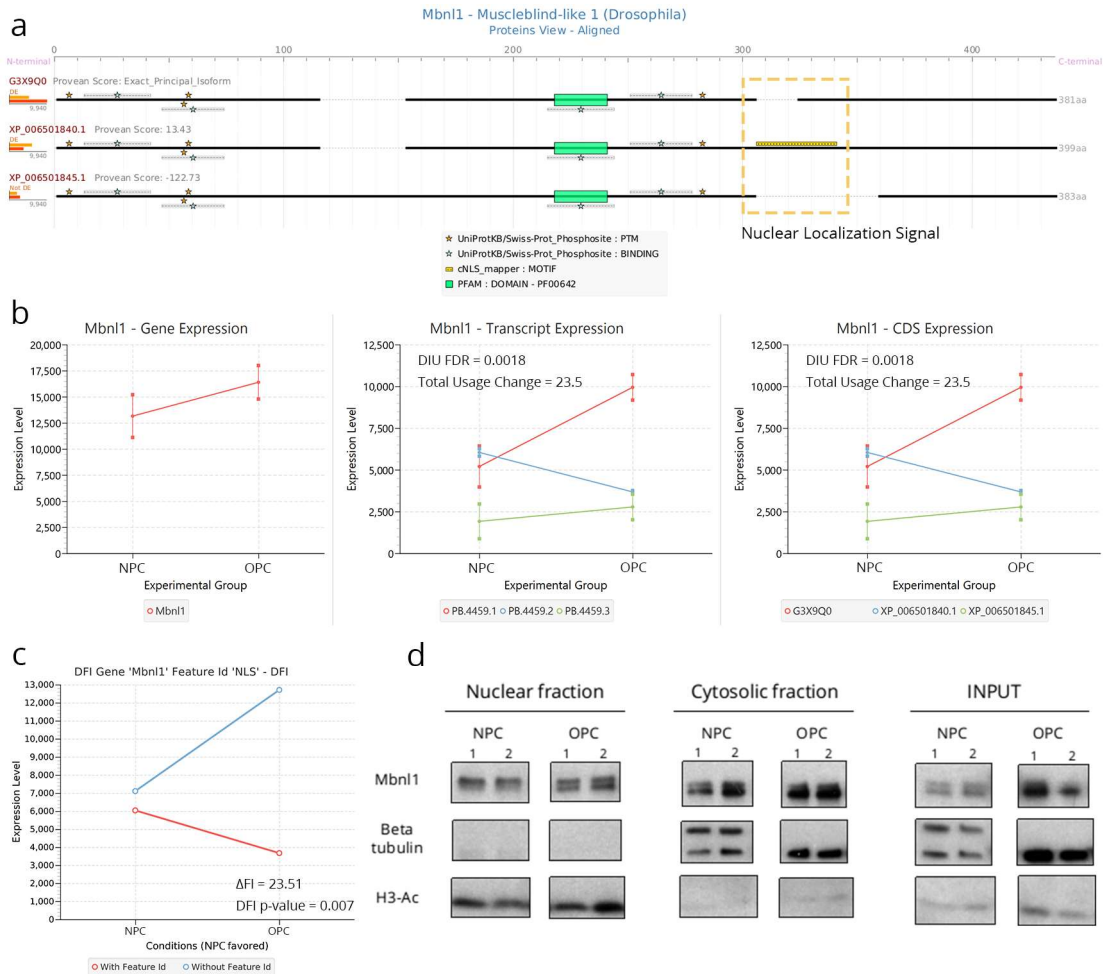

**Figure S12: *Mbn1* AltTEM results.** A) Gene, transcript and CDS expression for *Mbn1*. The gene is positive for DIU both at the transcript and protein level. B) tappAS visualization of *Mbn1* functional annotation. Differential inclusion of an NLS signal is detected by tappAS comprehensive annotation. C) DFI results for *Mbn1* NLS signal. The feature is significantly differentially included, and its inclusion favored in NPCs. D) Western blot analysis of *Mbn1* in cytosolic and nuclear fractions of NPCs and OPCs. Together with a general increase in *Mbn1* expression in OPCs (INPUT), an increase in protein levels in the cytoplasm is observed, likely due to exclusion of the NLS signal (Cytosolic fraction).

| ISOFORM-RESOLVED ANNOTATION CATEGORY             | SOURCE/PREDICTOR            | ORGANISM                                         | REFERENCES                                                            |
|--------------------------------------------------|-----------------------------|--------------------------------------------------|-----------------------------------------------------------------------|
| <b>TRANSCRIPT LEVEL</b>                          |                             |                                                  |                                                                       |
| Nonsense-mediated decay (NMD)                    | In-house scripts            | mouse/human/fruit fly/Arabidopsis thaliana/maize | Zhang et al., 2009                                                    |
| miRNA                                            | miRBase                     | mouse/human                                      | Kozomara et al., 2019                                                 |
| miRNA binding sites                              | miRWalk2.0                  | mouse/human                                      | Dweep et al., 2015                                                    |
| miRNA binding sites                              | DIANA/microT                | fruit fly                                        | Paraskevopoulou et al., 2013                                          |
| miRNA binding sites                              | DORINA/Pictar2              | fruit fly                                        | Anders et al., 2012                                                   |
| miRNA binding sites                              | miRaNda                     | fruit fly                                        | Betel et al., 2010                                                    |
| miRNA binding sites                              | PITA                        | fruit fly                                        | Kertesz et al., 2007                                                  |
| miRNA binding sites                              | RNA22v2                     | fruit fly                                        | Loher & Rigoutsos, 2012                                               |
| miRNA binding sites                              | TargetScan                  | fruit fly                                        | Friedman et al., 2009                                                 |
| miRNA binding sites                              | psRNATarget                 | Arabidopsis thaliana/maize                       | Dai et al., 2018                                                      |
| PolyAdenylation Signal                           | UTRscan/UTRdb               | mouse/human/fruit fly/Arabidopsis thaliana/maize | Grillo et al., 2010                                                   |
| Upstream open reading frames                     | UTRscan/UTRdb               | mouse/human/fruit fly/Arabidopsis thaliana/maize | Grillo et al., 2010                                                   |
| 3' UTR regulatory elements (AU-rich, GU-rich...) | ScanForMotifs               | mouse                                            | Biswas et al., 2014                                                   |
| 5'-UTR and 3'-UTR regularotory elements          | UTRscan/UTRdb               | mouse/human/fruit fly/Arabidopsis thaliana/maize | Grillo et al., 2010                                                   |
| Repeat regions and low complexity elements       | RepBase RepeatMasker        | mouse/human/fruit fly/Arabidopsis thaliana/maize | <a href="http://www.repeatmasker.org">http://www.repeatmasker.org</a> |
| RBP binding sites                                | CLIPdb                      | mouse                                            | Yang et al., 2015                                                     |
| <b>PROTEIN LEVEL</b>                             |                             |                                                  |                                                                       |
| PFAM domains                                     | PFAM-HMMER3                 | mouse/human/fruit fly/Arabidopsis thaliana/maize | Finn et al., 2014                                                     |
| SMART domains                                    | SMART-HMMER3                | Arabidopsis thaliana/maize                       | Letunic et al., 2017                                                  |
| TIGRFAM protein families                         | TIGRFAM-HMMER3              | Arabidopsis thaliana/maize                       | Haft et al., 2001                                                     |
| classical nuclear localization signals           | NLSmapper                   | mouse                                            | Kosugi <i>et al.</i> , 2009                                           |
| Signal Peptides                                  | SIGNALP 4.0                 | mouse/human/Arabidopsis thaliana/maize           | Petersen et al., 2011                                                 |
| Coiled-coil regions                              | COILS                       | mouse/human/Arabidopsis thaliana/maize           | Lupas et al., 1991                                                    |
| Disordered Regions                               | MobiDB Lite                 | mouse                                            | Necci et al., 2017                                                    |
| Transmembrane regions                            | TMHMM Server v. 2.0         | mouse/human/Arabidopsis thaliana/maize           | Krogh et al., 2001                                                    |
| Protein motifs, sites and regions                | UniprotKB                   | mouse/human/fruit fly/Arabidopsis thaliana/maize | The UniProt Consortium, 2019                                          |
| Post-translational modifications                 | PhosphositePlus + UniprotKB | mouse/human/fruit fly/Arabidopsis thaliana/maize | Hornbeck et al., 2012                                                 |

**Table S1: Resources used to generate the isoform-resolved functional annotation files** available in the tappAS application.

| Organism                       | Reference                        | # Isoform Resolved Functional Features | Mean Features/Isoform | % Isoforms with Functional Features |               |       |
|--------------------------------|----------------------------------|----------------------------------------|-----------------------|-------------------------------------|---------------|-------|
|                                |                                  |                                        |                       | Transcript Level                    | Protein Level | Total |
| <i>Mus musculus</i>            | PacBio (Tardaguila et al., 2018) | 386,114                                | 35.23                 | 98.08                               | 98.20         | 99.73 |
|                                | RefSeq78                         | 2,628,525                              | 23.61                 | 90.24                               | 96.38         | 94.66 |
|                                | Ensembl86                        | 1,314,089                              | 11.32                 | 59.17                               | 92.70         | 68.11 |
| <i>Homo sapiens</i>            | RefSeq78                         | 5,977,941                              | 38.48                 | 94.42                               | 98.19         | 96.40 |
|                                | Ensembl86                        | 2,888,409                              | 15.31                 | 65.03                               | 95.38         | 71.88 |
| <i>Drosophila melanogaster</i> | Flybase617                       | 1,023,087                              | 29.45                 | 80.85                               | 83.85         | 85.86 |
| <i>Arabidopsis thaliana</i>    | Ensembl34                        | 457,825                                | 7.58                  | 54.56                               | 90.43         | 85.35 |
| <i>Zea mays</i>                | Ensembl34                        | 1,099,124                              | 7.12                  | 65.29                               | 86.24         | 91.08 |

**Table S2:** summary of annotated functional features and their distribution across transcript and protein isoforms (i.e. the level of resolution of the annotation) for the different species for which transcriptome annotations are included in tappAS.

| Annotation level                               | Source                             | Category                               | No. feature occurrences | No. isoforms annotated |
|------------------------------------------------|------------------------------------|----------------------------------------|-------------------------|------------------------|
| Transcript<br>11970 isoforms<br>7167 genes     | ScanForMotifs                      | PAS                                    | 8511                    | 5750 (48%)             |
|                                                | ScanForMotifs                      | 3'UTR motifs                           | 11797                   | 5325 (44%)             |
|                                                | UTRscan/UTRsite                    | 5'UTR motifs                           | 325                     | 315 (3%)               |
|                                                | UTRscan/UTRsite                    | uORF                                   | 7444                    | 3045 (25%)             |
|                                                | RepeatMasker                       | Repeat regions                         | 19269                   | 7245 (61%)             |
|                                                | MiRWalk/miRbase + in-house scripts | 3'UTR miRNA binding sites              | 106392                  | 9474 (79%)             |
|                                                | clipDB + in-house scripts          | RNA-binding sites (RBPs)               | 47821                   | 7279 (61%)             |
| Protein<br>10813 coding isoforms<br>7167 genes | In-house scripts                   | Nonsense-Mediated Decay (NMD)          | 329                     | 329 (3%)               |
|                                                | PFAM-HMMER3                        | Domains                                | 20973                   | 9608 (89%)             |
|                                                | COILS + UniprotKB                  | Coiled coil                            | 6669                    | 2856 (26%)             |
|                                                | TMHMM + UniprotKB                  | Transmembrane regions                  | 12543                   | 2061 (19%)             |
|                                                | SignalP                            | Signal peptides                        | 824                     | 824 (8%)               |
|                                                | MOBIDB                             | Disordered regions                     | 11256                   | 5626 (52%)             |
|                                                | cNLS mapper + UniprotKB            | Nuclear Localization Signals (NLS)     | 7599                    | 4297 (40%)             |
|                                                | PSP + UniprotKB                    | Post-Translational Modifications (PTM) | 100804                  | 8506 (79%)             |
|                                                | UniprotKB                          | Compositional bias                     | 2260                    | 1480 (14%)             |
|                                                | UniprotKB                          | Motif                                  | 6579                    | 2897 (27%)             |
|                                                | UniprotKB                          | Intramembrane                          | 159                     | 62 (0.6%)              |
|                                                | UniprotKB                          | Active site                            | 1770                    | 1168 (11%)             |
| UniprotKB                                      | Binding                            | 12790                                  | 3339 (31%)              |                        |

**Table S3:** summary of annotation results for the mouse transcriptome of NPC and OPC primary cells.

Number of features at the transcript and protein levels annotated are indicated, together with their database of origin and the percentage of isoforms in the transcriptome that contain them.

| <b>3' UTR motif</b>             | <b>p-value</b> | <b>Adj.p-value</b> | <b>No. varying genes (%)</b> | <b>p-value random set</b> | <b>Adj.p-value random set</b> |
|---------------------------------|----------------|--------------------|------------------------------|---------------------------|-------------------------------|
| GU-rich Destabilization Element | 0.0024         | 0.05               | 197 (69.4%)                  | 0.26                      | 0.69                          |
| GU-Rich Element (GRE)           | 0.0281         | 0.33               | 243 (66.2%)                  | 0.16                      | 0.60                          |

**Table S4:** ID-level FDA results for UTR motifs using the positional approach. Motifs with a p-value less than 0.01 are listed. Significance was assessed via Fisher's Exact Test with Bonferroni-Hochberg multiple-testing correction. Results for a randomized set of RefSeq transcripts (N = 11,970) are reported as control.

| <b>miRNA</b>   | <b>p-value</b> | <b>Adj.p-value</b> | <b>No. varying genes (%)</b> | <b>p-value random set</b> | <b>Adj.p-value random set</b> |
|----------------|----------------|--------------------|------------------------------|---------------------------|-------------------------------|
| mmu-miR-335-3p | 9e-4           | 0.46               | 61 (62.2%)                   | 0.21                      | 1                             |
| mmu-miR-590-3p | 0.0059         | 0.77               | 83 (56.8%)                   | 0.11                      | 1                             |
| mmu-miR-880-3p | 0.0071         | 0.77               | 21 (70%)                     | 0.34                      | 1                             |
| mmu-miR-7b-3p  | 0.0101         | 0.77               | 43 (60.5%)                   | 0.38                      | 1                             |
| mmu-miR-223-3p | 0.0145         | 0.77               | 35 (61.4%)                   | 0.74                      | 1                             |

**Table S5:** ID-level FDA results for miRNA binding motifs using the positional approach, top-5 ranked by adjusted p-value. Significance assessed via Fisher's Exact Test with Bonferroni-Hochberg multiple-testing correction. Results for a randomized set of RefSeq transcripts (N = 11,970) are reported as control.



| Feature                   | No. of DFI features | NPC favored | OPC favored | No. of tested features |
|---------------------------|---------------------|-------------|-------------|------------------------|
| 3' UTR motif              | 177                 | 74          | 103         | 1640                   |
| 5' UTR motif              | 27                  | 7           | 20          | 131                    |
| Active site               | 14                  | 5           | 9           | 106                    |
| Binding motif             | 113                 | 50          | 63          | 805                    |
| Coiled coil               | 82                  | 43          | 39          | 866                    |
| Compositional bias region | 41                  | 13          | 28          | 279                    |
| Disordered region         | 210                 | 119         | 91          | 1598                   |
| PFAM domain               | 345                 | 135         | 210         | 759                    |
| Intramembrane protein     | 7                   | 0           | 7           | 10                     |
| miRNA binding             | 1601                | 716         | 885         | 9627                   |
| Motif                     | 75                  | 32          | 43          | 596                    |
| PTM                       | 947                 | 401         | 546         | 7600                   |
| RBP binding               | 79                  | 36          | 43          | 694                    |
| Signal peptide            | 24                  | 2           | 22          | 117                    |
| Transmembrane domain      | 141                 | 62          | 79          | 803                    |
| uORF                      | 591                 | 228         | 363         | 3118                   |

**Table S6: Whole-transcriptome summary of DFI results.** For each functional annotation category, this table summarizes the number of features detected as significantly differentially included (DFI p-value < 0.05), the number of features whose inclusion is favored in each of the conditions (NPCs or OPCs) and the total number of tested features (regardless of whether they were positive or negative for DFI).
